# Supplementary material
Source: Elsevier journal article supplement (https://www.sciencedirect.com/science/article/pii/S188558571500078X)
Supplement: mmc1 [file mmc1.pdf]

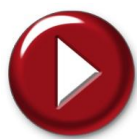

**Supplementary material**

---

**Influence of Intravenous Nitrate Treatment on Early Mortality  
Among Patients With Acute Heart Failure. NITRO-EAHFE  
Study**

Pablo Herrero-Puente,<sup>a,\*</sup> Javier Jacob,<sup>b</sup> Francisco Javier Martín-Sánchez,<sup>c</sup> Joaquín Vázquez-Álvarez,<sup>a</sup> Pablo Martínez-Cambor,<sup>d</sup> Òscar Miró,<sup>e</sup> Francisco Javier Lucas-Imberón,<sup>f</sup> Aleida Martínez-Zapico,<sup>g</sup> and Pere Llorens<sup>h</sup>; on behalf of the members of the ICA-SEMES group

<sup>a</sup> *Unidad de Gestión Clínica de Urgencias, Hospital Universitario Central de Asturias (HUCA), Grupo de Investigación de Urgencias-HUCA, Oviedo, Spain*

<sup>b</sup> *Servicio de Urgencias, Hospital Universitari de Bellvitge, L'Hospitalet de Llobregat, Barcelona, Spain*

<sup>c</sup> *Servicio de Urgencias y UCE, Hospital Clínico San Carlos, Madrid, Spain*

<sup>d</sup> *Oficina de Investigación Biosanitaria de Asturias (OIB-FICYT), Spain and Universidad Autónoma de Chile, Chile*

<sup>e</sup> *Área de Urgencias, Hospital Clinic, Grupo de Investigación "Urgencias: procesos y patologías", IDIBAPS, Barcelona, Spain*

<sup>f</sup> *Servicio de Urgencias, Hospital General Universitario de Albacete, Albacete, Spain*

<sup>g</sup> *Área de Gestión Clínica de Medicina Interna, Hospital Universitario Central de Asturias, Oviedo, Spain*

<sup>h</sup> *Servicio de Urgencias-UCE y Hospitalización a Domicilio, Hospital Universitario General de Alicante, Alicante, Spain*

---

## ANEXO 1

Miembros del grupo de Insuficiencia Cardíaca Aguda de la Sociedad Española de Medicina de Urgencias y Emergencias (Grupo ICA-SEMES)

Héctor Alonso, Hospital Marqués de Valdecilla (Santander); Cristina Gil y Marta Fuentes, Hospital Universitario de Salamanca (Salamanca); María José Pérez-Durá y Eva Salvo, Hospital La Fe (Valencia); Víctor Gil y Rafael Perelló, Hospital Clínic (Barcelona); José Pavón y Ana Bella Alvarez, Hospital Dr. Negrín (Las Palmas de Gran Canaria); Antonio Noval, Hospital Insular (Las Palmas de Gran Canaria); Manuel Garrido, Hospital Virgen Macarena (Sevilla); José M. Torres, Hospital Reina Sofía (Córdoba); Maisi López-Grima, Hospital Dr. Peset (Valencia); Alfons Aguirre y Maria Angels Pedragosa, Hospital del Mar (Barcelona); Helena Sancho, Mabel Alonso y Francisco Ruiz, Hospital de Valme (Sevilla); Antonio Giménez y José Miguel Franco, Hospital Miguel Servet (Zaragoza); Sergio Pardo, Hospital General de Elche y San Juan (Alicante); Ana Belen Mecina, Hospital de Alcorcón (Alcorcón, Madrid); Josep Tost, Belen de la Fuente Penco y Antònia López Sánchez, Consorci Sanitari de Terrassa del Hospital de Terrassa (Terrassa, Barcelona); Jordi Fabregat, Hospital Mutua de Terrassa (Terrassa, Barcelona); Francisco Epelde, Consorci Sanitari i Universitari Parc Taulí (Sabadell, Barcelona); Fernando Richard, Hospital General Yagüe (Burgos); Susana Sánchez, Hospital Rio Ortega (Valladolid); Pascual Piñera, Hospital Reina Sofía (Murcia); Raquel Torres Garate, Hospital Severo Ochoa (Leganés, Madrid); Aitor Alquezar y Miguel Alberto Rizzi, Hospital Sant Pau (Barcelona); Roberto Calvache, Hospital de Henares (Coslada, Madrid); Maria Teresa Lorca y Luis Calderón, Hospital del Tajo (Aranjuez, Madrid); Rodolfo Romero, Hospital de Getafe (Getafe, Madrid); Juan Antonio Andueza, Hospital Gregorio Marañón (Madrid); Rut Gaya, Hospital Juan XXIII (Tarragona); Belén Prieto García, Maria García García, Joaquín Vázquez Álvarez, Marta Sánchez González y Jose Juan Gil Román, Hospital Universitario Central de Asturias (Oviedo).

## ANEXO 2

### Modelo logístico del *propensity score*

Se incluyeron las variables que en la comparación entre los 2 grupos en función de si recibían (grupo NITRO) o no (grupo CONTROL) tratamiento con nitratos intravenosos tenían diferencias con un valor de  $p < 0,20$ . A parte de estas variables se introdujo también en el modelo de regresión logística que generó el *propensity* algunas variables que fueron consideradas, *a priori*, como relevantes por el equipo investigador sobre la base de criterios organizativos, epidemiológicos o clínicos, como por ejemplo el sexo y el hospital al que pertenecía el paciente. Posteriormente se hizo un análisis por regresión logística en el que se obtuvieron los resultados que se muestran en la siguiente tabla. Con este análisis se generó la probabilidad de pertenencia a cada uno de los grupos de tratamiento, con lo que se hizo el emparejamiento posterior entre los que tenían una diferencia entre estas probabilidades  $< 0,05$ .

Tras esto se calculó el valor del estadístico C, que fue 0,77 (intervalo de confianza del 95%, 0,75-0,79).

|                       | <b>B</b> | <b>E.T.</b> | <b>p</b> | <b>OR (IC95%)</b>      |
|-----------------------|----------|-------------|----------|------------------------|
| Edad (años decimales) | -0,008   | 0,006       | 0,144    | 0,992 (0,981-1,003)    |
| Sexo                  | -0,223   | 0,110       | 0,042    | 0,800 (0,645-0,992)    |
| Hospital              |          |             | < 0,001  |                        |
| Hospital (1)          | 1,148    | 0,456       | 0,012    | 3,153 (1,291-7,702)    |
| Hospital (2)          | 1,831    | 0,456       | < 0,001  | 6,239 (2,553-15,247)   |
| Hospital (3)          | 1,762    | 0,462       | < 0,001  | 5,822 (2,354-14,400)   |
| Hospital (4)          | 1,235    | 0,751       | 0,100    | 3,438 (0,789-14,977)   |
| Hospital (5)          | 0,211    | 0,641       | 0,742    | 1,235 (0,351-4,340)    |
| Hospital (6)          | 0,437    | 0,641       | 0,495    | 1,548 (0,441-5,434)    |
| Hospital (7)          | 1,546    | 0,453       | 0,001    | 4,690 (1,929-11,403)   |
| Hospital (8)          | 2,525    | 0,543       | < 0,001  | 12,487 (4,307-36,200)  |
| Hospital (9)          | 0,843    | 0,499       | 0,091    | 2,324 (0,874-6,180)    |
| Hospital (10)         | 3,423    | 0,427       | < 0,001  | 30,660 (13,271-70,835) |

|                                             |        |       |         |                         |
|---------------------------------------------|--------|-------|---------|-------------------------|
| Hospital (11)                               | 0,104  | 0,638 | 0,871   | 1,109 (0,318-3,870)     |
| Hospital (12)                               | 2,594  | 0,568 | < 0,001 | 13,378 (4,391-40,753)   |
| Hospital (13)                               | 3,849  | 0,447 | < 0,001 | 46,969 (19,560-112,782) |
| Hospital (14)                               | 1,538  | 0,633 | 0,015   | 4,656 (1,347-16,095)    |
| Hospital (15)                               | 1,563  | 0,497 | 0,002   | 4,772 (1,802-12,641)    |
| Hospital (16)                               | 0,854  | 0,580 | 0,141   | 2,349 (0,753-7,325)     |
| Hospital (17)                               | 3,397  | 0,479 | < 0,001 | 29,882 (11,688-76,399)  |
| Hospital (18)                               | 0,335  | 0,859 | 0,696   | 1,398 (0,260-7,531)     |
| Hospital (19)                               | 0,767  | 0,716 | 0,284   | 2,153 (0,529-8,760)     |
| Hospital (20)                               | 0,910  | 0,534 | 0,088   | 2,484 (0,872-7,071)     |
| Hospital (21)                               | 1,431  | 0,481 | 0,003   | 4,183 (1,629-10,740)    |
| Hospital (22)                               | 4,140  | 1,378 | 0,003   | 62,810 (4,214-936,114)  |
| Hospital (23)                               | -0,470 | 1,134 | 0,678   | 0,625 (0,068-5,766)     |
| Hospital (24)                               | 1,410  | 0,700 | 0,044   | 4,094 (1,038-16,151)    |
| Hospital (25)                               | 1,063  | 1,238 | 0,390   | 2,895 (0,256-32,742)    |
| Hospital (26)                               | 1,144  | 0,658 | 0,082   | 3,139 (0,864-11,398)    |
| Hipertensión arterial                       | -0,166 | 0,155 | 0,284   | 0,847 (0,626-1,148)     |
| Diabetes mellitus                           | -0,062 | 0,110 | 0,575   | 0,940 (0,758-1,166)     |
| Dislipemia                                  | 0,116  | 0,111 | 0,296   | 1,123 (0,903-1,396)     |
| Cardiopatía isquémica                       | 0,403  | 0,132 | 0,002   | 1,496 (1,155-1,937)     |
| Accidente cerebrovascular                   | 0,148  | 0,150 | 0,324   | 1,159 (0,865-1,554)     |
| Fibrilación auricular                       | -0,172 | 0,125 | 0,169   | 0,842 (0,659-1,076)     |
| Arteriopatía periférica                     | 0,446  | 0,188 | 0,018   | 1,561 (1,079-2,259)     |
| Antagonistas de la aldosterona en domicilio | -0,249 | 0,146 | 0,089   | 0,780 (0,586-1,038)     |
| ARA II en domicilio                         | 0,003  | 0,122 | 0,982   | 1,003 (0,790-1,273)     |
| Antagonistas del calcio en domicilio        | 0,182  | 0,118 | 0,123   | 1,200 (0,952-1,513)     |
| Bloqueadores beta en domicilio              | 0,159  | 0,114 | 0,164   | 1,172 (0,937-1,465)     |
| Nitratos en domicilio                       | 1,307  | 0,128 | < 0,001 | 3,696 (2,876-4,751)     |
| Antiagregantes en domicilio                 | -0,029 | 0,126 | 0,820   | 0,972 (0,759-1,244)     |
| Anticoagulantes orales en domicilio         | -0,091 | 0,141 | 0,515   | 0,913 (0,693-1,202)     |
| Ventilación mecánica no invasiva            | 1,214  | 0,180 | < 0,001 | 3,366 (2,365-4,791)     |

|                                             |        |       |         |                     |
|---------------------------------------------|--------|-------|---------|---------------------|
| Diuréticos de asa en bolo en urgencias      | -0,407 | 0,166 | 0,014   | 0,666 (0,481-0,922) |
| Diuréticos de asa en perfusión en urgencias | 0,309  | 0,217 | 0,154   | 1,362 (0,890-2,085) |
| Índice de Barthel < 60 puntos               | 0,096  | 0,133 | 0,472   | 1,101 (0,848-1,429) |
| SatO <sub>2</sub> < 90%                     | 0,217  | 0,127 | 0,088   | 1,242 (0,968-1,593) |
| Sodio < 135 mEq/l                           | -0,003 | 0,132 | 0,979   | 0,997 (0,769-1,291) |
| NYHA del episodio III-IV                    | 0,420  | 0,211 | 0,046   | 1,522 (1,007-2,300) |
| Presión arterial sistólica (mmHg)           | 0,025  | 0,002 | < 0,001 | 1,025 (1,021-1,029) |
| Frecuencia cardiaca (lpm)                   | 0,007  | 0,002 | 0,001   | 1,007 (1,003-1,011) |
| Frecuencia respiratoria (rpm)               | 0,038  | 0,009 | < 0,001 | 1,039 (1,022-1,057) |
| Constante                                   | -8,200 | 0,768 | < 0,001 | 0,000               |

ARA II: antagonista del receptor de la angiotensina II; IC95%: intervalo de confianza del 95%; NYHA: *New York Heart Association*; OR: *odds ratio*.
